# Supplementary material for: Influences of Long-Term Exercise and High-Fat Diet on Age-Related Telomere Shortening in Rats
Source: MDPI journal article supplement (doi:10.3390/cells11101605), 2022-05-10
Supplement: s1 [file s1]

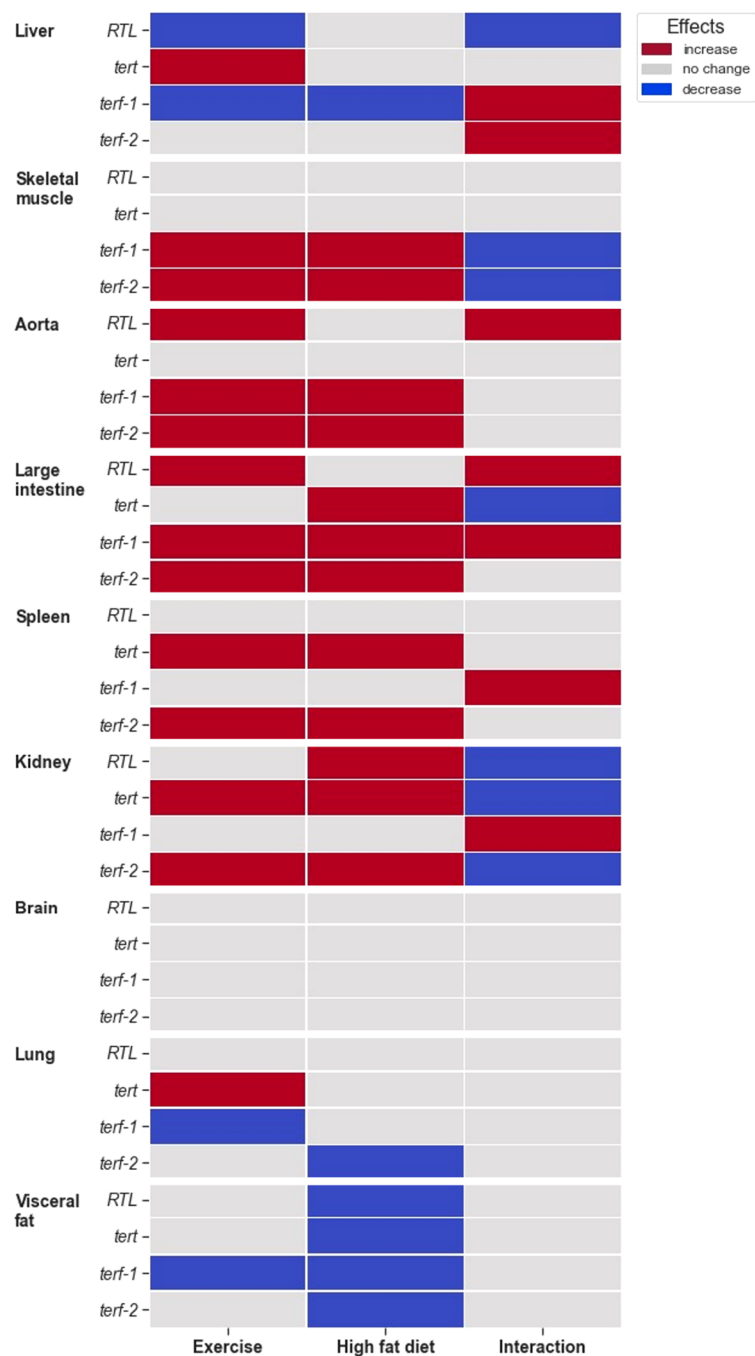

**Figure S1:** Effects matrix that visualizes the effects of exercise, HFD, and the interaction of both lifestyle factors on RTL and the mRNA expression of telomere-regulating genes. The two-tailed Student's t-test was used for independent samples' comparison. Significant effects are shown in color and refer to the respective control group ( $p \leq 0.05$ ). Grey boxes indicate the lack of a significant effect.
